# Supplementary material for: Unfolding is the driving force for mitochondrial import and degradation of the Parkinson's disease-related protein DJ-1
Source: PubMed Central journal article supplement (PMC8645234; doi:10.1242/jcs.258653), 2021-11-25
Supplement: joces-134-258653-s1.pdf [file joces-134-258653-s1.pdf]

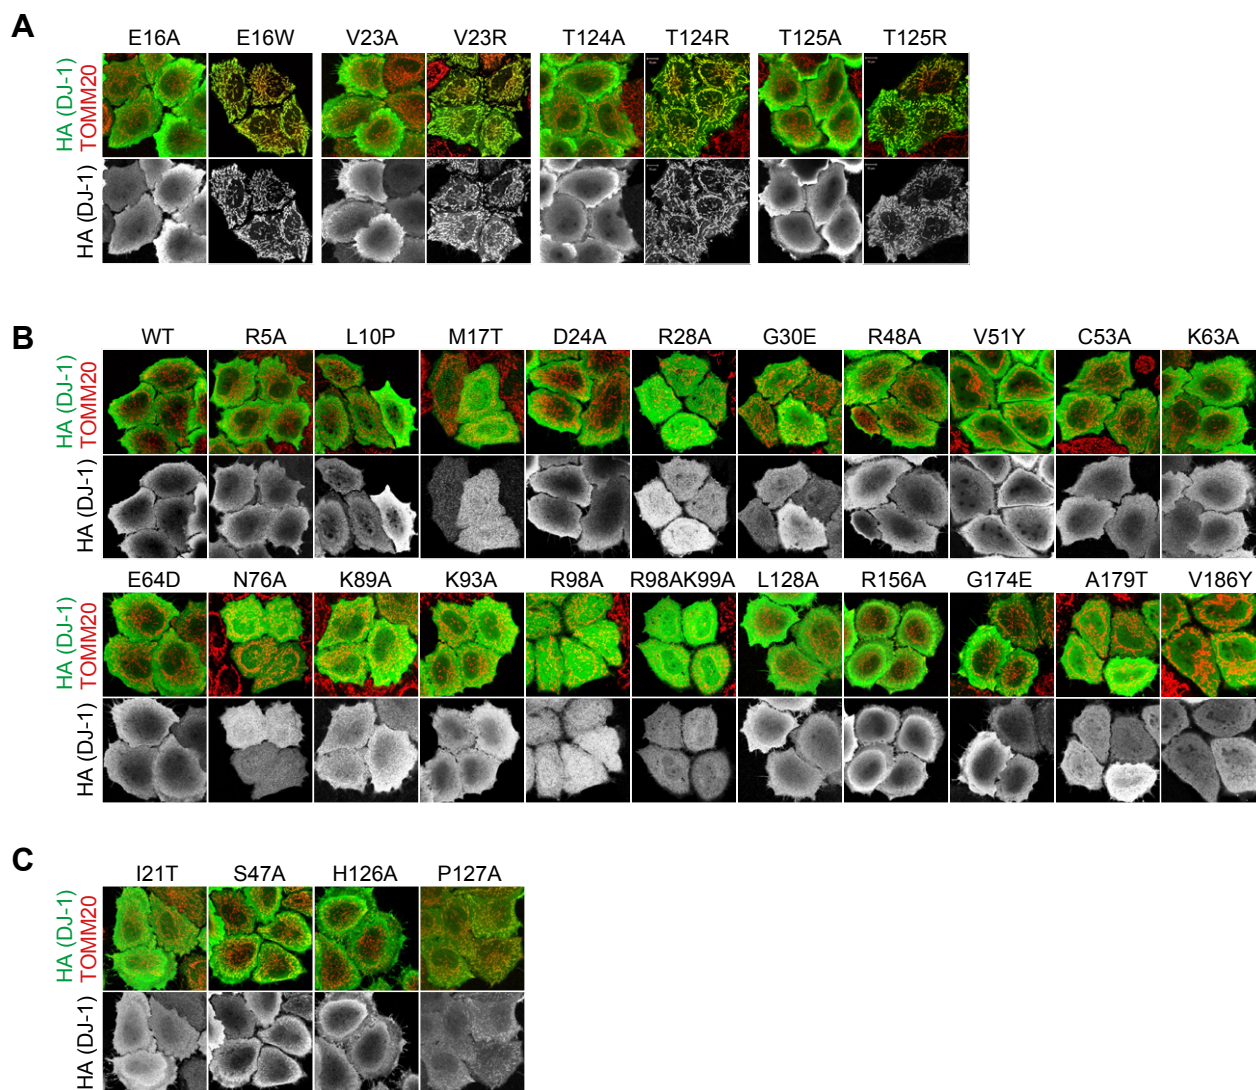

**Fig. S1.** (A) Representative images depicting the cytosolic localization of DJ-1 E16A, V23A, T124A, and T125A mutants with the corresponding mitochondrial localization of DJ-1 E16W, V23R, T124R, and T125R mutants. (B) Immunostaining images of DJ-1 mutants categorized as “cytosolic localization” in the quantitative analysis shown in Fig. 1D. (C) Immunostaining images of DJ-1 mutants categorized as “variable or mixed localization” in the quantitative analysis shown in Fig. 1D. In (A), (B), and (C), the top panels show localization of the DJ-1 constructs alone, and the bottom panels show merged images for the DJ-1 constructs (green) and the mitochondrial marker TOMM20 (red). All constructs were expressed in DJ-1 knockout cells.

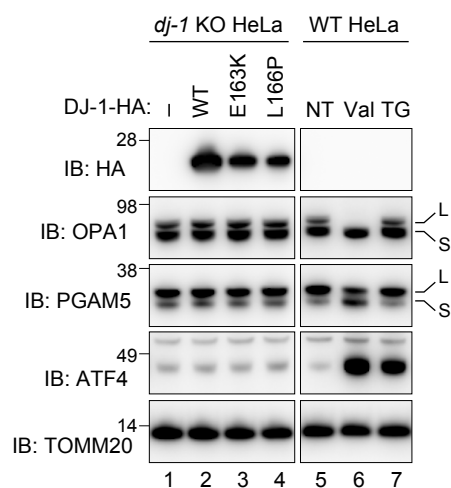

**Fig. S2.** No changes in the PGAM5 and OPA1 cleavage profile or the induction of ATF4 were observed following the expression of the mitochondria-localized pathogenic DJ-1 mutants E163K (lane 3) or L166P (lane 4). In contrast, when cells were treated with 10 μM Valinomycin for 3 hours (lane 6), changes to PGAM5 and Opa1 cleavage and ATF4 induction were observed. NT, cells were treated with DMSO (non-treated); Val, 10 μM valinomycin for 3 hours; TG, 300 nM thapsigargin for 3 hours.

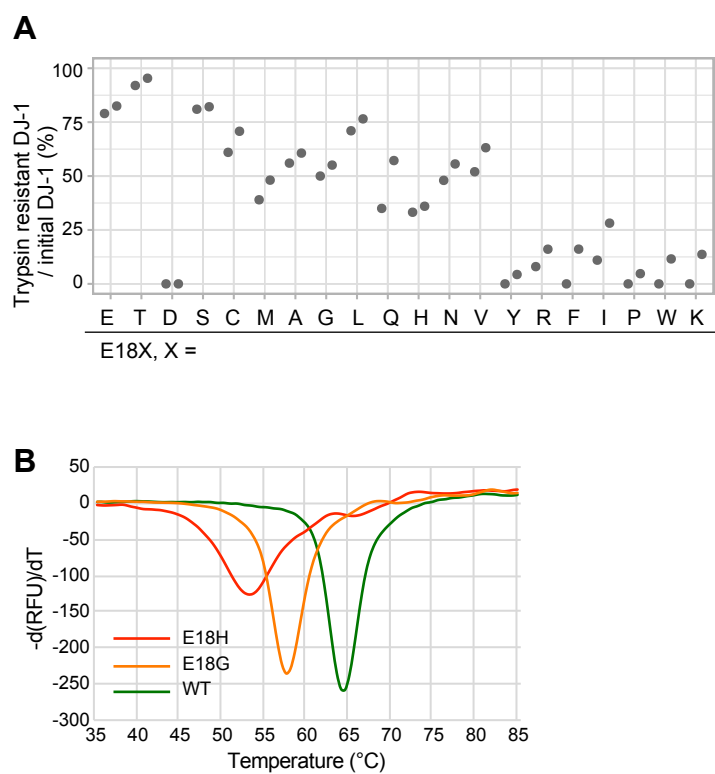

**Fig. S3.** (A) Recombinant C-terminal 6xHis-tagged E18X mutants were incubated with trypsin for 22 h, and the degree of trypsin sensitivity was quantified in two biological replicates. (B) Representative thermal spectra of the C-terminal 6xHis-tagged WT, E18G, and E18H DJ-1 proteins.

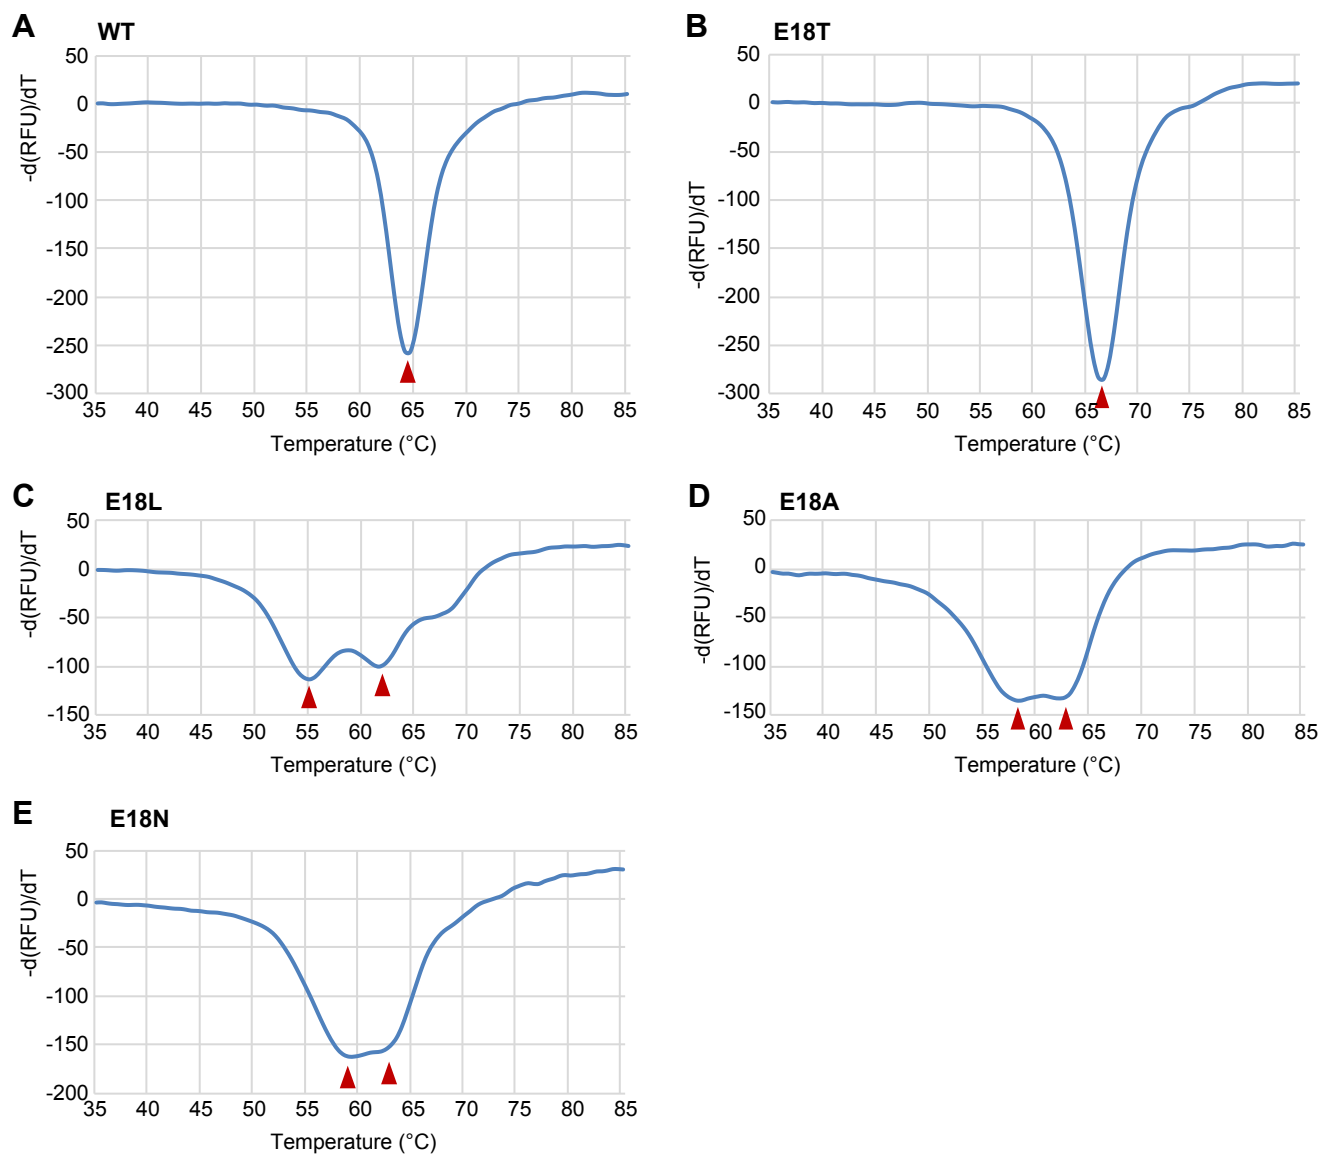

**Fig. S4.** Representative double-peak thermal spectra for the E18L/A/N mutants. Like WT (A), most spectra for the E18X mutants presented as a single peak for the E18T mutant (B). However, spectra for the E18L (C), E18A (D), and E18N (E) mutants had two peaks, suggesting unfolding transitions that are bimodal.

**Table S1.**

| REAGENT or RESOURCE                             | SOURCE                     | IDENTIFIER                       |
|-------------------------------------------------|----------------------------|----------------------------------|
| Antibodies                                      |                            |                                  |
| Mouse monoclonal anti-HA (TANA2)                | MBL                        | Cat. # M180-3, RRID:AB_10951811  |
| Rabbit polyclonal anti-TOMM20 (FL-145)          | Santa Cruz Biotechnologies | Cat. # sc-11415, RRID:AB_2207533 |
| Rabbit polyclonal anti-TOMM20 (11802-1-AP)      | Proteintech                | Cat# 11802-1-AP, RRID:AB_2207530 |
| Mouse monoclonal anti-DJ-1 (3E8)                | MBL                        | Cat# M043-3S, RRID:AB_592469     |
| Mouse monoclonal anti-Actin (C4)                | Merck Millipore            | Cat. # MAB1501R, RRID:AB_2223041 |
| Mouse monoclonal anti-DDDDK (FLA-1)             | MBL                        | Cat. # M185-3L, RRID:AB_11123930 |
| Rabbit polyclonal anti-GFP (ab6556)             | Abcam                      | Cat# ab6556, RRID:AB_305564      |
| Rabbit polyclonal anti-PGAM5 (ab126534)         | Abcam                      | Cat# ab126534, RRID:AB_11127076  |
| Rabbit anti-ATF4                                | Cell Signaling Technology  | Cat# 11815, RRID:AB_2616025      |
| Rat monoclonal anti-Tubulin (YL1/2)             | Abcam                      | Cat# ab6160, RRID:AB_305328      |
| Mouse monoclonal anti-TIMM23                    | BD Biosciences             | Cat# 611223, RRID:AB_398755      |
| Mouse monoclonal anti-OPA1                      | BD Biosciences             | Cat# 612606, RRID:AB_399888      |
| Goat polyclonal anti-HSP60 (N-20)               | Santa Cruz Biotechnologies | Cat. # sc-1052, RRID:AB_631683   |
| Goat anti-Rabbit IgG Alexa Fluor 488 conjugated | Thermo Fisher Scientific   | Cat# A-11034, RRID:AB_2576217    |
| Goat anti-Rabbit IgG Alexa Fluor 568 conjugated | Thermo Fisher Scientific   | Cat# A-11036, RRID:AB_10563566   |
| Goat anti-Mouse IgG Alexa Fluor 488 conjugated  | Thermo Fisher Scientific   | Cat# A-11029, RRID:AB_2534088    |
| Goat anti-Mouse IgG Alexa Fluor 568 conjugated  | Thermo Fisher Scientific   | Cat# A-11031, RRID:AB_144696     |
| Goat anti-Mouse IgG Alexa Fluor 647 conjugated  | Thermo Fisher Scientific   | Cat# A-21236, RRID:AB_2535805    |
| Donkey anti-Goat IgG Alexa Fluor 488 conjugated | Abcam                      | Cat# ab150129, RRID:AB_2687506   |

|                                                    |                         |                                    |
|----------------------------------------------------|-------------------------|------------------------------------|
| Donkey anti-Rabbit IgG Alexa Fluor 568 conjugated  | Abcam                   | Cat# ab175470, RRID:AB_2783823     |
| Goat Anti-Rabbit IgG horseradish peroxidase-linked | Jackson Immuno Research | Cat# 111-035-144, RRID:AB_2307391  |
| Goat Anti-Mouse IgG horseradish peroxidase-linked  | Jackson Immuno Research | Cat# 115-035-003, RRID:AB_10015289 |

**Table S2.** List of plasmids used in this study. WT means wild type.

| Plasmid name | Description                      | Source              |
|--------------|----------------------------------|---------------------|
| pNMDJ1-1     | For expression of DJ1-WT-HA      | Kojima et al. 2016  |
| pNMDJ1-2     | For expression of DJ1-E18A-HA    | Kojima et al. 2016  |
| pNMDJ1-3     | For expression of DJ1-C46S-HA    | Kojima et al. 2016  |
| pNMDJ1-4     | For expression of DJ1-C53A-HA    | Kojima et al. 2016  |
| pNMDJ1-6     | For expression of DJ1-L166P-HA   | Kojima et al. 2016  |
| pNMDJ1-7     | For expression of DJ1-M26I-HA    | Kojima et al. 2016  |
| pNMDJ1-16    | For expression of 6His-DJ1-WT    | Matsuda et al. 2017 |
| pNMDJ1-17    | For expression of 6His-DJ1-L166P | Matsuda et al. 2017 |
| pNMDJ1-18    | For expression of 6His-DJ1-M26I  | Matsuda et al. 2017 |
| pNMDJ1-19    | For expression of 6His-DJ1-E18A  | Matsuda et al. 2017 |
| pNMDJ1-32    | For expression of DJ1-L10P-HA    | Kojima et al. 2016  |
| pNMDJ1-33    | For expression of DJ1-E163K-HA   | Kojima et al. 2016  |
| pNMDJ1-35    | For expression of DJ1-E64D-HA    | Kojima et al. 2016  |
| pNMDJ1-36    | For expression of DJ1-A179T-HA   | Kojima et al. 2016  |
| pNMDJ1-37    | For expression of 6His-DJ1-L10P  | Matsuda et al. 2017 |
| pNMDJ1-38    | For expression of 6His-DJ1-E163K | Matsuda et al. 2017 |
| pNMDJ1-40    | For expression of 6His-DJ1-E64D  | Matsuda et al. 2017 |
| pNMDJ1-45    | For expression of DJ1-H126A-HA   | Kojima et al. 2016  |
| pNMDJ1-48    | For expression of 6His-DJ1-N76D  | Matsuda et al. 2017 |
| pNMDJ1-73    | For expression of DJ1-C106K-HA   | This study          |
| pNMDJ1-84    | For expression of DJ1-M17T-HA    | This study          |
| pNMDJ1-85    | For expression of DJ1-I21T-HA    | This study          |
| pNMDJ1-86    | For expression of DJ1-D24A-HA    | This study          |
| pNMDJ1-87    | For expression of DJ1-R27A-HA    | This study          |
| pNMDJ1-88    | For expression of DJ1-R28A-HA    | This study          |
| pNMDJ1-90    | For expression of DJ1-V50Y-HA    | This study          |
| pNMDJ1-91    | For expression of DJ1-V51Y-HA    | This study          |
| pNMDJ1-92    | For expression of DJ1-K63A-HA    | This study          |
| pNMDJ1-93    | For expression of DJ1-D68A-HA    | This study          |
| pNMDJ1-94    | For expression of DJ1-R156A-HA   | This study          |
| pNMDJ1-95    | For expression of DJ1-V186Y-HA   | This study          |
| pNMDJ1-103   | For expression of DJ1-R5A-HA     | This study          |
| pNMDJ1-106   | For expression of DJ1-E15A-HA    | This study          |
| pNMDJ1-107   | For expression of DJ1-E16A-HA    | This study          |
| pNMDJ1-108   | For expression of DJ1-V23A-HA    | This study          |
| pNMDJ1-109   | For expression of DJ1-V33A-HA    | This study          |

---

|            |                                    |            |
|------------|------------------------------------|------------|
| pNMDJ1-111 | For expression of DJ1-N76A-HA      | This study |
| pNMDJ1-112 | For expression of DJ1-I105A-HA     | This study |
| pNMDJ1-114 | For expression of DJ1-G157E-HA     | This study |
| pNMDJ1-115 | For expression of DJ1-T124A-HA     | This study |
| pNMDJ1-116 | For expression of DJ1-T125A-HA     | This study |
| pNMDJ1-118 | For expression of DJ1-P127A-HA     | This study |
| pNMDJ1-133 | For expression of DJ1-K89A-HA      | This study |
| pNMDJ1-134 | For expression of DJ1-R98A-HA      | This study |
| pNMDJ1-136 | For expression of DJ1-R98A/K99A-HA | This study |
| pNMDJ1-137 | For expression of DJ1-R48A-HA      | This study |
| pNMDJ1-138 | For expression of DJ1-G174E-HA     | This study |
| pNMDJ1-141 | For expression of DJ1-T34A-HA      | This study |
| pNMDJ1-142 | For expression of DJ1-G30E-HA      | This study |
| pNMDJ1-146 | For expression of DJ1-L128A-HA     | This study |
| pNMDJ1-190 | For expression of DJ1-T124R-HA     | This study |
| pNMDJ1-191 | For expression of DJ1-T125R-HA     | This study |
| pNMDJ1-192 | For expression of DJ1-A104R-HA     | This study |
| pNMDJ1-194 | For expression of DJ1-A14W-HA      | This study |
| pNMDJ1-195 | For expression of DJ1-E16W-HA      | This study |
| pNMDJ1-200 | For expression of DJ1-V23R-HA      | This study |
| pNMDJ1-201 | For expression of DJ1-V44P-HA      | This study |
| pNMDJ1-202 | For expression of DJ1-S47A-HA      | This study |
| pNMDJ1-203 | For expression of DJ1-K93A-HA      | This study |
| pNMDJ1-204 | For expression of DJ1-F164S-HA     | This study |
| pNMDJ1-205 | For expression of DJ1-E18T-HA      | This study |
| pNMDJ1-206 | For expression of DJ1-E18D-HA      | This study |
| pNMDJ1-207 | For expression of DJ1-E18S-HA      | This study |
| pNMDJ1-208 | For expression of DJ1-E18C-HA      | This study |
| pNMDJ1-209 | For expression of DJ1-E18K-HA      | This study |
| pNMDJ1-210 | For expression of DJ1-E18M-HA      | This study |
| pNMDJ1-211 | For expression of DJ1-E18G-HA      | This study |
| pNMDJ1-212 | For expression of DJ1-E18L-HA      | This study |
| pNMDJ1-213 | For expression of DJ1-E18Q-HA      | This study |
| pNMDJ1-214 | For expression of DJ1-E18H-HA      | This study |
| pNMDJ1-215 | For expression of DJ1-E18N-HA      | This study |
| pNMDJ1-216 | For expression of DJ1-E18V-HA      | This study |
| pNMDJ1-217 | For expression of DJ1-E18Y-HA      | This study |
| pNMDJ1-218 | For expression of DJ1-E18R-HA      | This study |

---



---

|            |                                                    |            |
|------------|----------------------------------------------------|------------|
| pNMDJ1-219 | For expression of DJ1-E18F-HA                      | This study |
| pNMDJ1-220 | For expression of DJ1-E18I-HA                      | This study |
| pNMDJ1-221 | For expression of DJ1-E18P-HA                      | This study |
| pNMDJ1-222 | For expression of DJ1-E18W-HA                      | This study |
| pNMDJ1-223 | For simultaneous expression of GFP and DJ1-WT-HA   | This study |
| pNMDJ1-224 | For simultaneous expression of GFP and DJ1-E18K-HA | This study |
| pNMDJ1-225 | For simultaneous expression of GFP and DJ1-M26I-HA | This study |
| pNMDJ1-226 | For expression of DJ1-E18K/R5P-HA                  | This study |
| pNMDJ1-227 | For expression of DJ1-E18K/L7P-HA                  | This study |
| pNMDJ1-228 | For expression of DJ1-E18K/L10P-HA                 | This study |
| pNMDJ1-229 | For expression of DJ1-E18K/K12P-HA                 | This study |
| pNMDJ1-230 | For expression of DJ1-E18K/V33P-HA                 | This study |
| pNMDJ1-231 | For expression of DJ1-E18K/T34P-HA                 | This study |
| pNMDJ1-232 | For expression of 6His-tagged DJ1-E18T             | This study |
| pNMDJ1-233 | For expression of 6His-tagged DJ1-E18D             | This study |
| pNMDJ1-234 | For expression of 6His-tagged DJ1-E18S             | This study |
| pNMDJ1-235 | For expression of 6His-tagged DJ1-E18C             | This study |
| pNMDJ1-236 | For expression of 6His-tagged DJ1-E18K             | This study |
| pNMDJ1-237 | For expression of 6His-tagged DJ1-E18M             | This study |
| pNMDJ1-238 | For expression of 6His-tagged DJ1-E18G             | This study |
| pNMDJ1-239 | For expression of 6His-tagged DJ1-E18L             | This study |
| pNMDJ1-240 | For expression of 6His-tagged DJ1-E18Q             | This study |
| pNMDJ1-241 | For expression of 6His-tagged DJ1-E18H             | This study |
| pNMDJ1-242 | For expression of 6His-tagged DJ1-E18N             | This study |
| pNMDJ1-243 | For expression of 6His-tagged DJ1-E18V             | This study |
| pNMDJ1-244 | For expression of 6His-tagged DJ1-E18Y             | This study |
| pNMDJ1-245 | For expression of 6His-tagged DJ1-E18R             | This study |
| pNMDJ1-246 | For expression of 6His-tagged DJ1-E18F             | This study |
| pNMDJ1-247 | For expression of 6His-tagged DJ1-E18I             | This study |
| pNMDJ1-248 | For expression of 6His-tagged DJ1-E18P             | This study |
| pNMDJ1-249 | For expression of 6His-tagged DJ1-E18W             | This study |
| pNMDJ1-250 | For expression of DJ1-deltaC (1-134)-HA            | This study |
| pNMDJ1-253 | For expression of DJ64/YajL-deltaC-HA              | This study |
| pNMDJ1-254 | For expression of YajL-HA                          | This study |
| pNMDJ1-255 | For expression of YajL-deltaC (1-134)-HA           | This study |
| pNMDJ1-258 | For expression of YajL63/DJ1-deltaC-HA             | This study |
| pNMDJ1-259 | For expression of DJ17-GFP                         | This study |
| pNMDJ1-260 | For expression of DJ43-GFP                         | This study |

---

---

|            |                                 |                                          |
|------------|---------------------------------|------------------------------------------|
| pNMDJ1-262 | For expression of SNCA-HA       | This study                               |
| pNMDJ1-263 | For expression of DJ17- SNCA-HA | This study                               |
| pNMDJ1-264 | For expression of DJ43- SNCA-HA | This study                               |
| pNMDJ1-266 | For expression of GST-DJ17-GFP  | This study                               |
| pNMDJ1-267 | For expression of GST-DJ17-SNCA | This study                               |
| pCMV-Tet3G | For Dox inducible expression    | Takara Bio (Japan)                       |
| pTRE3G     | For Dox inducible expression    | Takara Bio (Japan)                       |
| pSu9-GFP   | For expression of Su9(MTS)-GFP  | Ishihara et al. 2006, Okatsu et al. 2015 |

---

References:

Ishihara *et al.* 2006, EMBO J. 25, 2966-2977. doi:10.1038/sj.emboj.7601184

Okatsu *et al.* 2015, J. Cell Sci. 128, 964-978. doi:10.1242/jcs.161000a

Kojima *et al.* 2016, Genes Cells 21, 772-788. doi:10.1111/gtc.12382

Matsuda *et al.* 2017, Sci Rep. 7, 12816. doi:10.1038/s41598-017-13146-0.
